# Supplementary material for: Enhanced gas selectivity induced by surface active oxygen in SnO/SnO2 heterojunction structures at different temperatures
Source: Royal Society of Chemistry journal article supplement (doi:10.1039/c8ra09965k), 2019-01-01
Supplement: c8ra09965k1.pdf [file c8ra09965k1.pdf]

# Enhanced gas selectivity induced by surface active oxygen in SnO/SnO<sub>2</sub> Hierarchical Structure at Different Temperature

Guilin Yin<sup>a,b</sup>, Jianwu Sun<sup>a</sup>, Fang Zhang<sup>b</sup>, Weiwei Yu<sup>c</sup>, Fang Peng<sup>c</sup>, Yan Sun<sup>c</sup>, Xin Chen<sup>c</sup>, Lei Xu<sup>a</sup>, Jing Lu<sup>b</sup>, Chao Luo<sup>b</sup>, Meiying Ge<sup>b,\*</sup>, Dannong He<sup>a,b,\*</sup>

<sup>a</sup> School of Material Science and Engineering, Shanghai Jiao Tong University,  
No.800 Dongchuan Road, Shanghai 200240, PR China

<sup>b</sup> National Engineering Research Center for Nanotechnology, No. 28 East Jiang Chuan  
Road, Shanghai 200241, PR China

<sup>c</sup> National Laboratory for Infrared Physics, Shanghai Institute of Technical Physics,  
Chinese Academy of Sciences, No. 500 Yutian Road, Shanghai 200083, PR China

\*Corresponding authors: Tel: 86 21 34291286; Fax: 86 21 34291125

E-mail: hdn\_nercn@163.com (Dannong He), meiyingge@163.com (Meiying Ge)

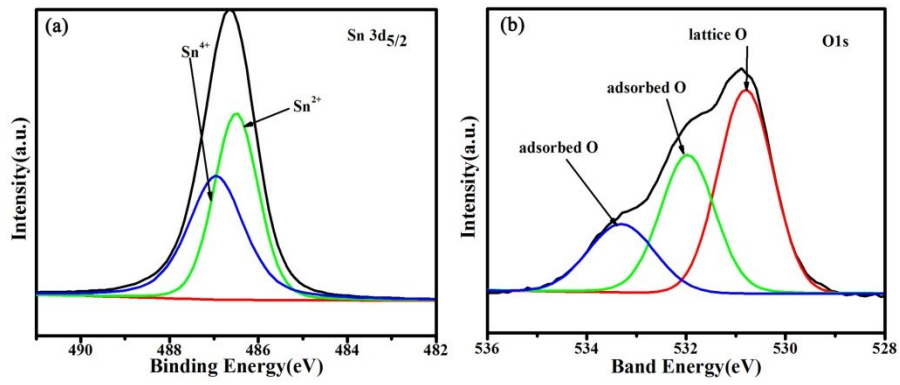

Fig. S1 High-resolution XPS spectrum of Sn 3d (a) and O1s (b) of the SnO/SnO<sub>2</sub> composite

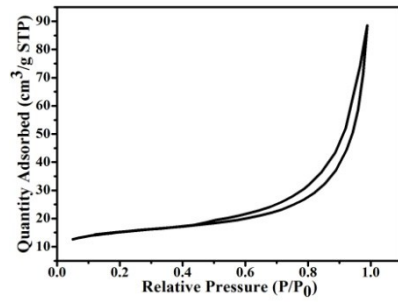

Fig. S2. The N<sub>2</sub> adsorption-desorption isotherms of the SnO/SnO<sub>2</sub> composite.

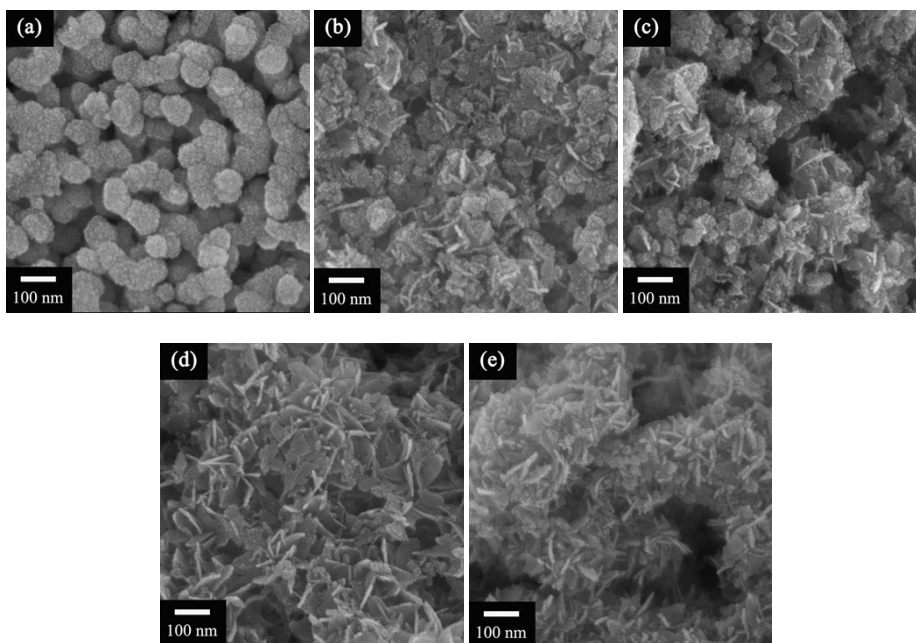

Fig. S3 SEM images with the mole ratio of HMTA : SnC<sub>2</sub>O<sub>4</sub> (a) 0:1, (b) 1:4, (c) 1:2, (d) 2:1, (e) 4:1.

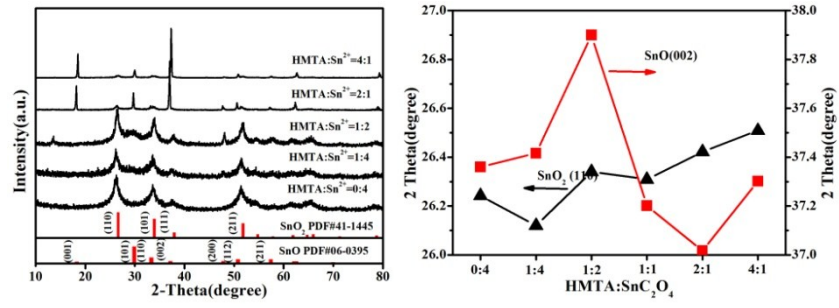

Fig. S4 XRD patterns and (b) peak position of SnO<sub>2</sub> (110) and SnO (002) of samples with different mole ratio of HMTA/SnC<sub>2</sub>O<sub>4</sub>.

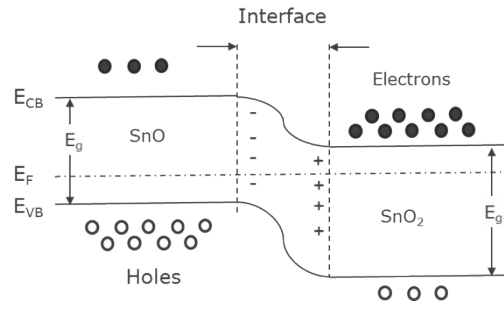

Fig. S5 Energy band diagrams of the SnO/SnO<sub>2</sub> heterocontact.

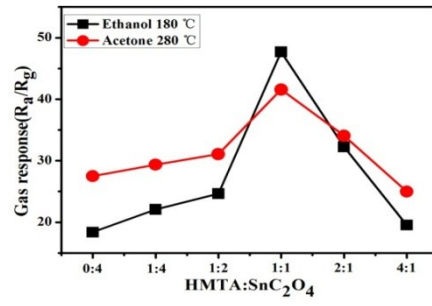

Fig. S6. Gas response of SnO/SnO<sub>2</sub> composite with different HMTA and SnC<sub>2</sub>O<sub>4</sub> ration for 100 ppm ethanol and acetone.

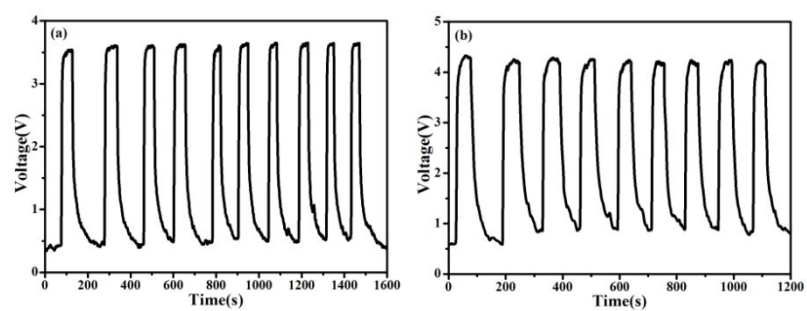

Fig. S7 Repeatability for (a) ethanol and (b) acetone at the optimum temperatures.
